# Supplementary material for: Antisense Oligonucleotide Therapeutic Approach for Suppression of Ataxin-1 Expression: A Safety Assessment
Source: PubMed Central journal article supplement — Mol Ther Nucleic Acids. 2020 Jul 25;21:1006–16. doi: 10.1016/j.omtn.2020.07.030 (PMC7452125; doi:10.1016/j.omtn.2020.07.030), 2020-07-25
Supplement: mmc1.pdf [file mmc1.pdf]

## Supplemental Information

### Antisense Oligonucleotide Therapeutic

#### Approach for Suppression of *Ataxin-1*

#### Expression: A Safety Assessment

Brennon O'Callaghan, Bente Hofstra, Hillary P. Handler, Holly B. Kordasiewicz, Tracy Cole, Lisa Duvick, Jillian Friedrich, Orion Rainwater, Praseuth Yang, Michael Benneyworth, Tessa Nichols-Meade, Wesley Heal, Rachel Ter Haar, Christine Henzler, and Harry T. Orr

# Supplemental information

Table S1: RT-qPCR Primers

Figure S1

Figure S2

Figure S3

**Table S1: RT-qPCR Primers**

| Primer                       | Sequence                                         | Probe                                  | Roche Catalog # |
|------------------------------|--------------------------------------------------|----------------------------------------|-----------------|
| mDcx1 1171F<br>mDcx1 1241R   | AGCTGACTCAGGTAACGACCA<br>GCTTTGACTTAGGTGTTGAGAGC | 11                                     | UPL 04685105001 |
| mBace1 809F<br>mBace1 934R   | TGCATCGCTACTACCAGAGG<br>CATGAGGGATGCTCACCAG      | 104                                    | UPL 04682225001 |
| mCcmd1 918F<br>mCcmd1 993R   | CAACGCACTTTCTTTCCAGAG<br>AGGGCTTCAATCTGTTCCTG    | 16                                     | UPL 04686896001 |
| mGfra1 1675R<br>mGfra1 1607F | TGCCCGATACATTGGATTTT<br>TTCCCACACACGTTTACCA      | 98                                     | UPL 04692152001 |
| mSpred1 664F<br>mSpred1 749R | GAGACGGCGACTTCTGACA<br>AGCCATCCACCACTTGAGTC      | 9                                      | UPL 04685075001 |
| mEtv5 407R<br>mEtv5 330F     | AGCTCCCGTTTGATCTTGG<br>TGAGCAGTTTGTCCCAGATTT     | 10                                     | UPL 04685091001 |
| mAtxn1 F<br>mAtxn1 R         | CACGGTCATTGACACCACACA<br>GGTAGCCGATGACAGGAGGTT   | FAM-CAGCCACGG/ZEN/CCTTCTACGCTGG-IABKFQ |                 |
| mGapd                        | Roche                                            |                                        | 5046211001      |

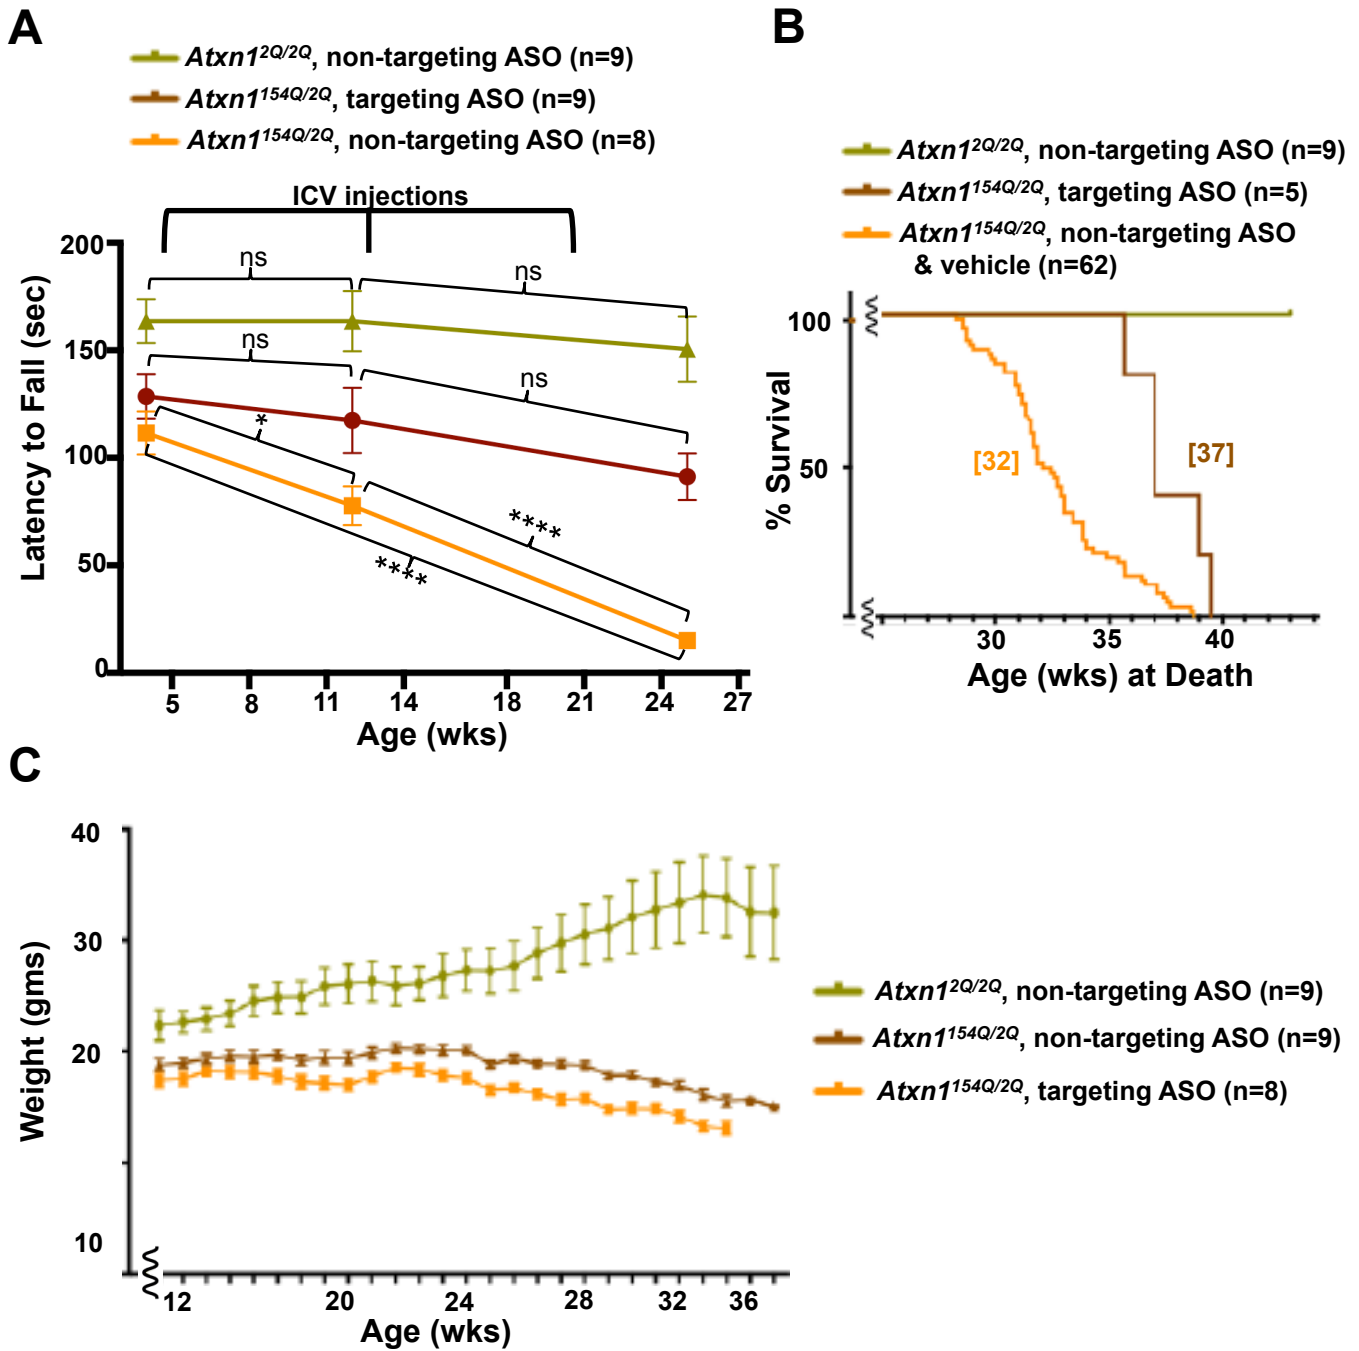

**Fig. S1** Three ICV injections of *Atxn1* targeting ASO stabilized motor performance and improved life span but did not improve failure to gain weight. (A) Motor performance on an accelerating rotarod at ages 5, 12 and 25 weeks. Data are presented as the mean  $\pm$  SEM. \*\* $P < 0.01$ , \*\*\* $P < 0.001$ , 1-way ANOVA. (B) Kaplan-Meier curves depicting mouse survival. (C) Failure-to-gain weight phenotype. Weights measured weekly.

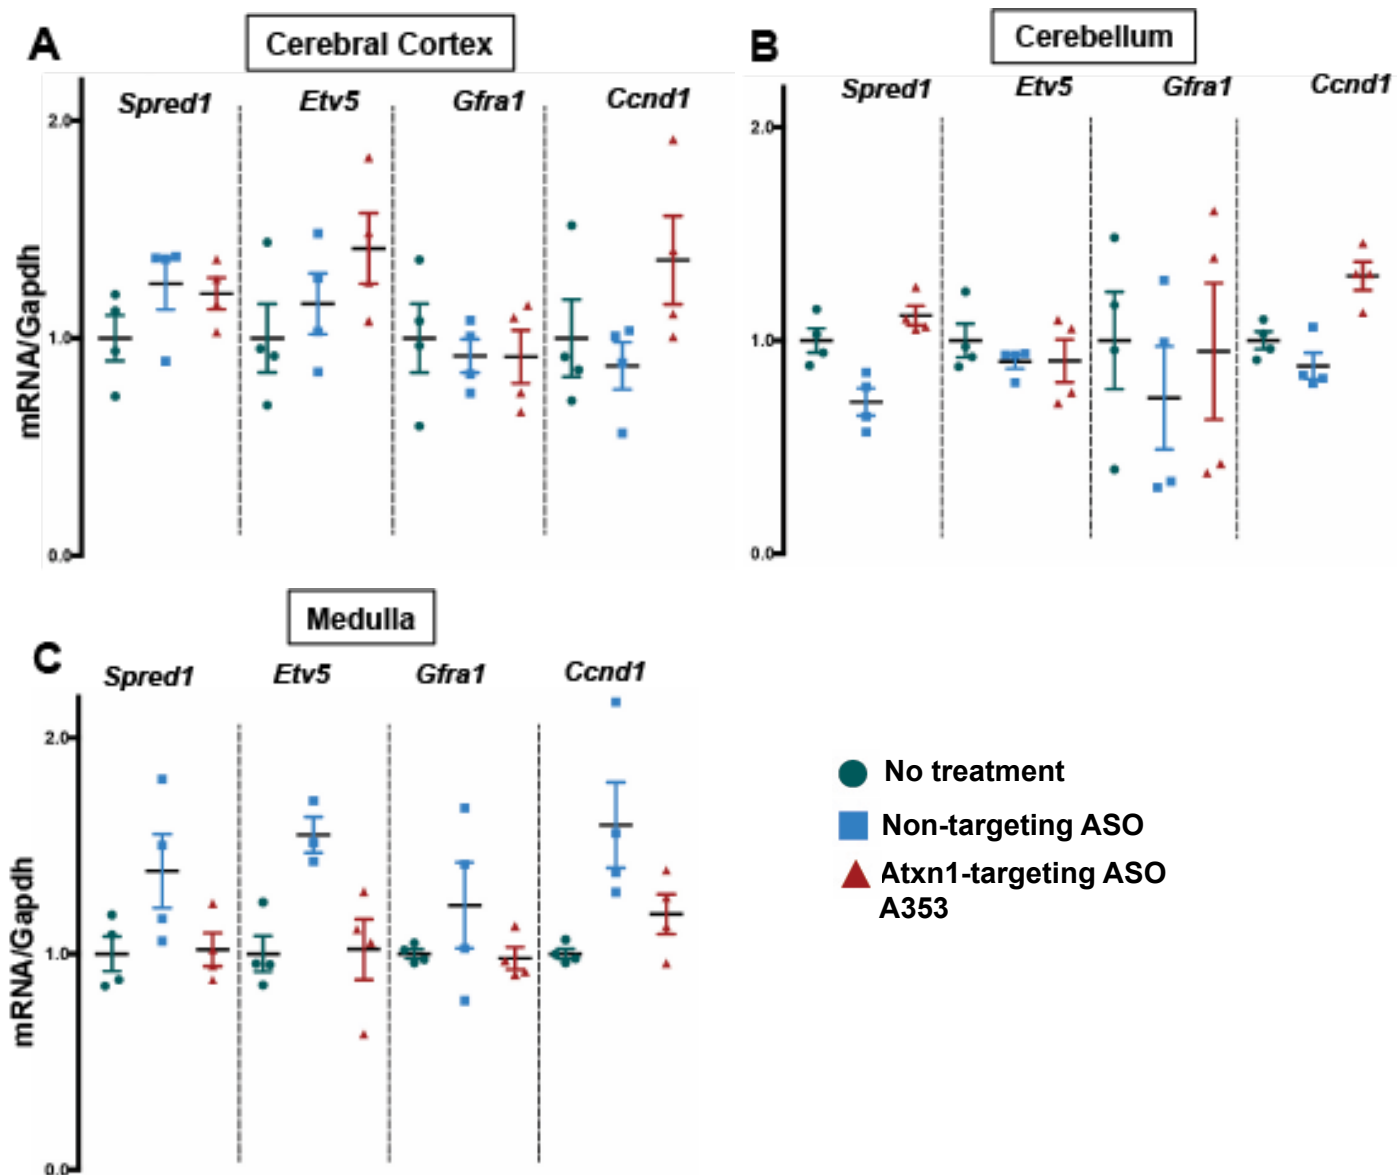

**Fig. S2** RT qPCR of 2Q/2Q mice; untreated, non-targeting ASO and Atxn1 targeting ASO was performed for four representative CIC influenced genes associated with gliomas. 2-way ANOVA showed no significant difference between groups

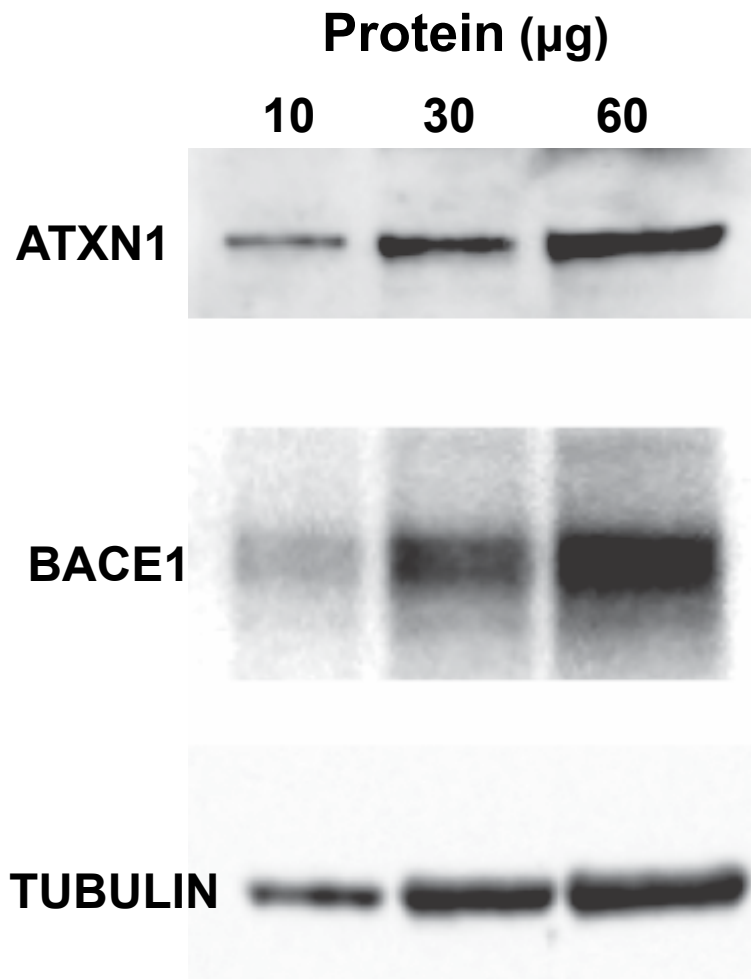

**Fig. S3** Protein dilution Western blot of ATXN1, BACE1, and TUBULIN.
